# Supplementary material for: Using ChIP-chip technology to reveal common principles of transcriptional repression in normal and cancer cells
Source: HighWire-hosted journal article supplement (doi:10.1101/gr.074609.107), 2008-03-17
Supplement: Komashko_FigureS2.pdf [file Komashko_FigureS2.pdf]

Figure S2

- A. Cell cycle profile of mouse 3T3 fibroblasts synchronized in G0/G1 phase by switching to low serum media containing 0.05% BCS for 72 hours.
- B. Cell cycle profile of mouse 3T3 fibroblasts serum starved for 72 hours and harvested after switching to media with 10% BCS for 16 hours.

A Serum deprivation, 0.05% BCS

B Serum stimulation, 10% BCS

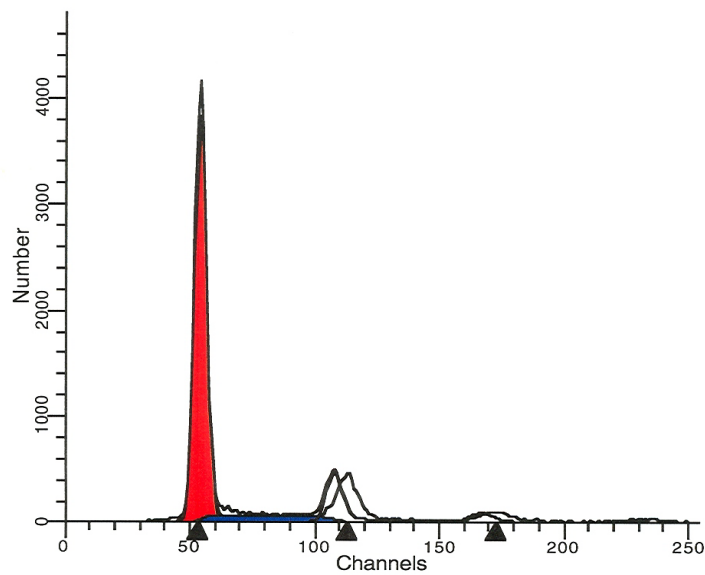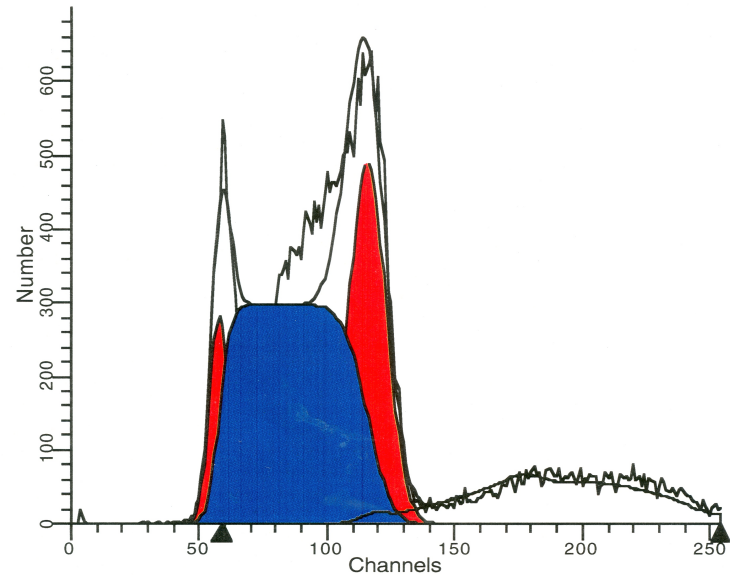

| Condition                    | Cell cycle phase (%) |       |       |
|------------------------------|----------------------|-------|-------|
|                              | G0/G1                | S     | G2/M  |
| Serum deprivation, 0.05% BCS | 86.60                | 13.4  | 0     |
| Serum stimulation, 10% BCS   | 9.12                 | 59.45 | 31.43 |
