# Supplementary material for: Using ChIP-chip technology to reveal common principles of transcriptional repression in normal and cancer cells
Source: HighWire-hosted journal article supplement (doi:10.1101/gr.074609.107), 2008-03-17

Figure S3. Reduction of POU5F1 protein level in differentiating mouse ES cells as determined by Western blot analysis

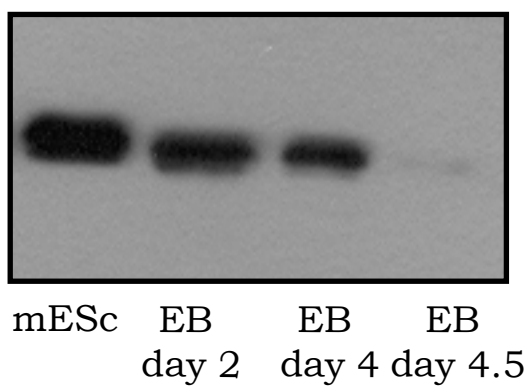

Supplement: Komashko_FigureS3.pdf [file Komashko_FigureS3.pdf]
