# Supplementary figures and images for: Using ChIP-chip technology to reveal common principles of transcriptional repression in normal and cancer cells
Source: HighWire-hosted journal article supplement (doi:10.1101/gr.074609.107), 2008-03-17

Figure S6 C. Top gene ontology categories bound by H3me3K9 in the LEGS set for all 12 cell lines

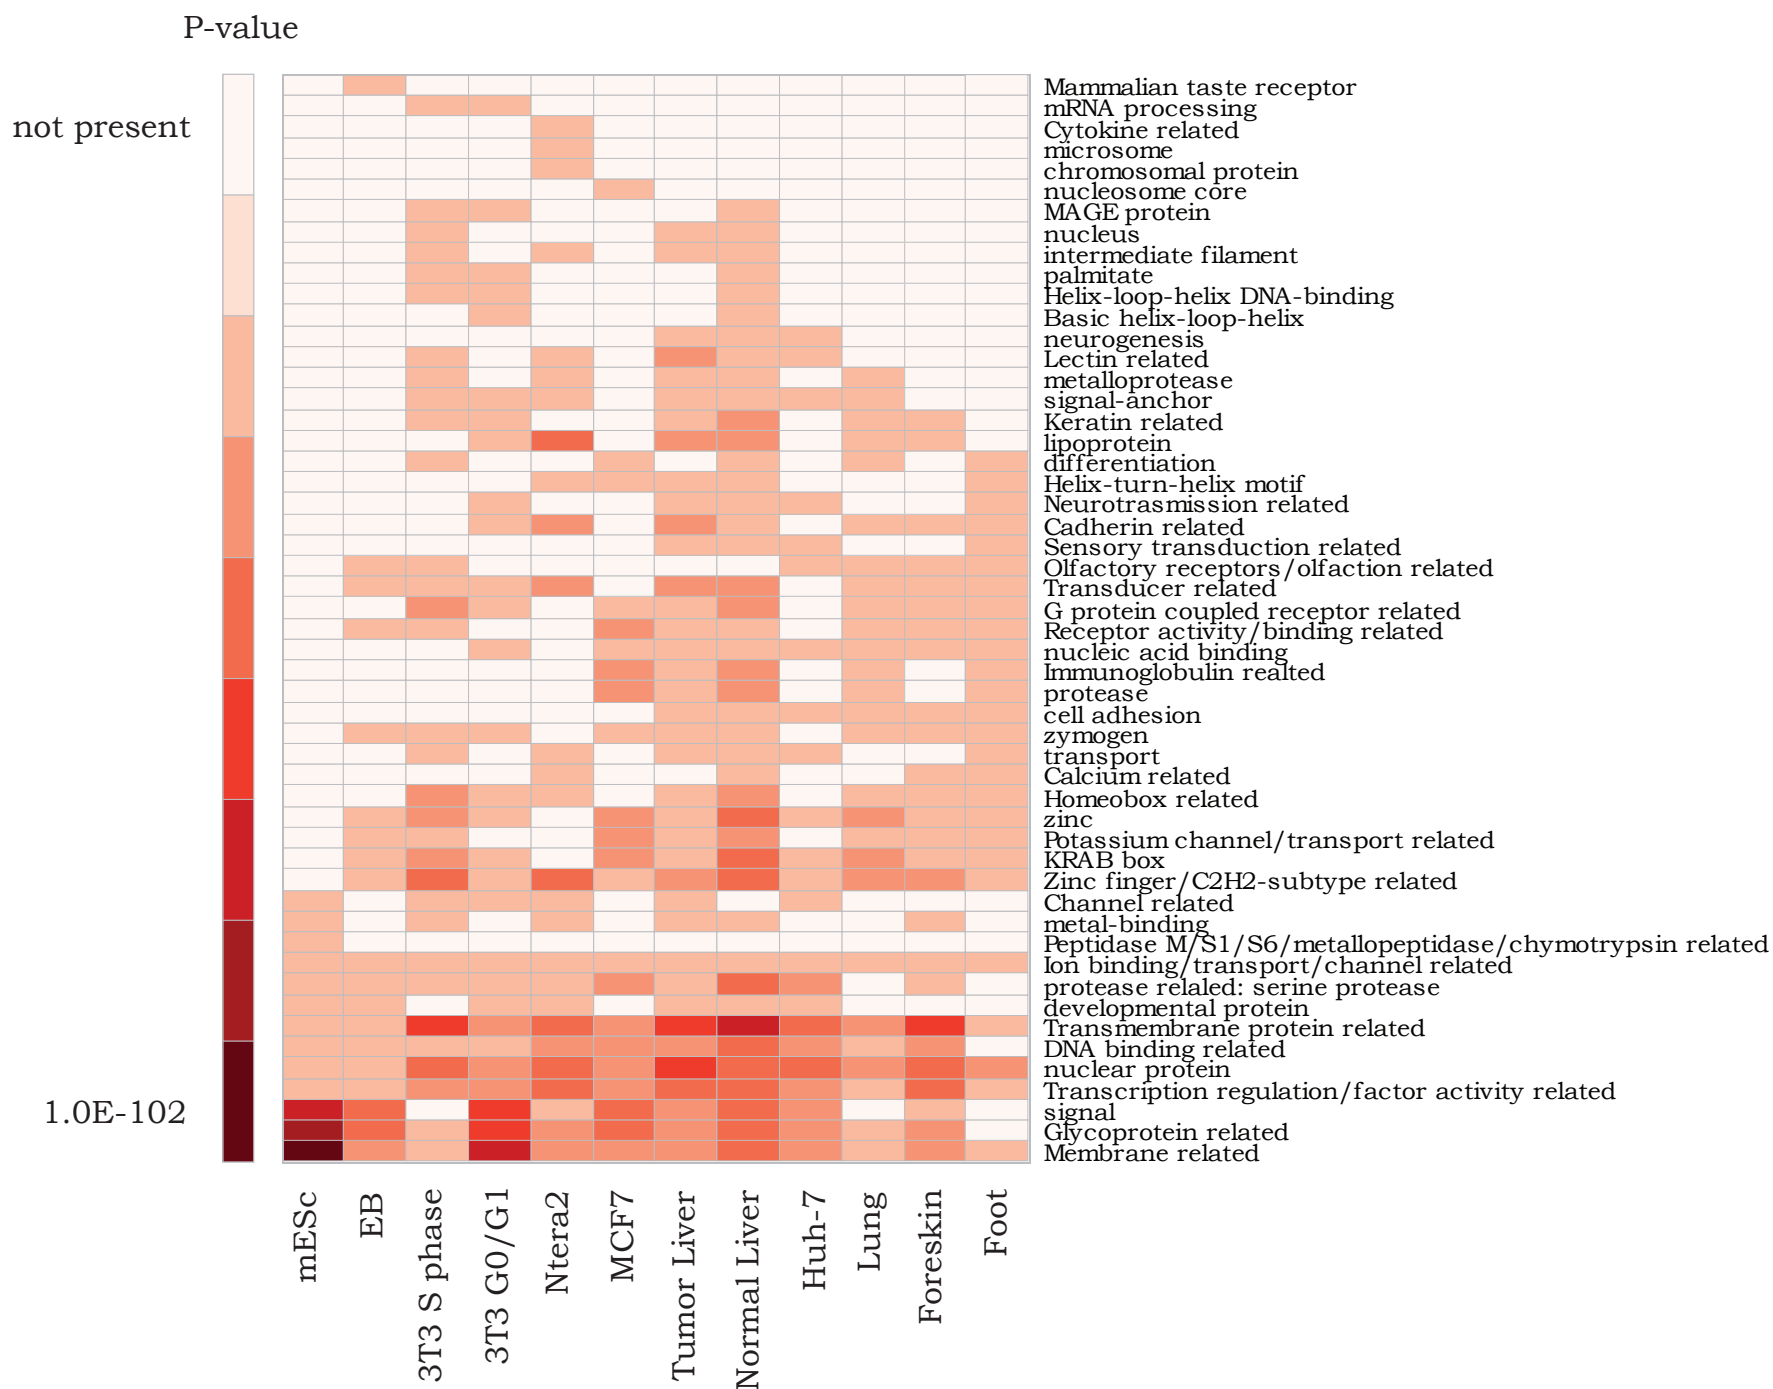

Supplement: Komashko_FigureS6C.pdf [file Komashko_FigureS6C.pdf]
